# Supplementary material for: The Genomic Landscape of Serrated Lesion of the Colorectum: Similarities and Differences With Tubular and Tubulovillous Adenomas
Source: Front Oncol. 2021 Oct 12;11:668466. doi: 10.3389/fonc.2021.668466 (PMC8546104; doi:10.3389/fonc.2021.668466)
Supplement: Supplementary Table 1 — Sequencing statistics. [file Table_1.xlsx]

## Sheet: Sheet1
SAMPLE	TARGET TERRITORY	TOTAL READS	MEAN TARGET COVERAGE	MEDIAN TARGET COVERAGE	FOLD ENRICHMENT	ZERO CVG TARGETS PCT	PCT TARGET BASES COVERED >10X	PCT TARGET BASES COVERED >20X	PCT TARGET BASES COVERED >30X
SSA001N	349355	1742081	504.148	448	8319.21	0	0.994458	0.990743	0.98689
SSA001T	349355	1696327	488.165	425	8359.34	0	0.985496	0.976485	0.966143
SSA002N	349355	1402288	408.178	371	8221.86	0.00062	0.994639	0.990454	0.98685
SSA002T	349355	1679077	488.685	440	8233.85	0	0.995217	0.991685	0.987815
SSA003N	349355	2673106	751.208	628	8378.58	0	0.996104	0.992246	0.990583
SSA003T	349355	2860540	813.278	702	8272.43	0	0.99607	0.994776	0.993059
SSA004N	349355	2717675	766.452	652	8300.33	0	0.995643	0.994221	0.991733
SSA004T	349355	2659461	759.128	681	8225.21	0	0.996322	0.995037	0.993268
SSA005N	349355	1621734	465.99	414	8280.91	0.00062	0.992841	0.989561	0.986455
SSA005T	349355	1852171	533.027	475	8288.98	0	0.994544	0.991204	0.988138
SSA006N	349355	1174272	337.869	301	8269.97	0	0.991562	0.986515	0.979611
SSA006T	349355	1332077	382.225	339	8258.58	0	0.993265	0.988035	0.984071
SSA007N	349355	2966839	834.681	737	8277.6	0	0.99514	0.9924	0.989426
SSA007T	349355	2941365	784.046	661	8285.46	0.001239	0.98604	0.977241	0.965428
SSA008N	349355	1412642	404.97	367	8286.79	0.00062	0.994227	0.989372	0.986103
SSA008T	349355	1522788	431.051	379	8316.53	0	0.992337	0.986864	0.982522
SSA009N	349355	2180106	623.213	551	8290.43	0	0.995188	0.992535	0.989249
SSA009T	349355	2317995	657.225	563	8315.15	0	0.995397	0.991811	0.989157
SSA010N	349355	2926948	761.678	638	8241.66	0	0.98361	0.971253	0.95891
SSA010T	349355	3284076	868.232	731	8246.64	0	0.99161	0.982485	0.974917
SSA011N	349355	2091430	596.631	510	8324.9	0	0.994676	0.990368	0.987388
SSA011T	349355	2252791	654.464	574	8271.17	0	0.995755	0.993087	0.990377
SSA012N	349355	3158077	881.198	752	8326.39	0	0.995317	0.993142	0.991333
SSA012T	349355	2842027	807.088	687	8283.32	0	0.995758	0.993769	0.992532
SSA013N	349355	2923553	819.249	682	8272.97	0	0.996499	0.994332	0.992752
SSA013T	349355	3322844	941.76	834	8248.67	0	0.996803	0.995432	0.993829
SSA014N	349355	1880337	531.64	421	8322.91	0	0.989927	0.980908	0.973368
SSA014T	349355	1773327	502.929	438	8301.57	0.00062	0.993411	0.988387	0.984801
SSA015N	349355	4139100	1090.85	774	8355.33	0	0.993894	0.989249	0.984995
SSA015T	349355	2637326	691.456	560	8232.19	0	0.995331	0.991301	0.987683
SSA016N	349355	2797764	762.06	574	8328.26	0	0.992005	0.987159	0.981102
SSA016T	349355	3341077	911.335	716	8312.32	0	0.993975	0.991627	0.989246
